# Supplementary material for: Ten hub genes associated with progression and prognosis of pancreatic carcinoma identified by co-expression analysis
Source: PubMed Central journal article supplement — Int J Biol Sci. 2018 Jan 12;14(2):124–36. doi: 10.7150/ijbs.22619 (PMC5821034; doi:10.7150/ijbs.22619), 2018-01-12
Supplement: ijbsv14p0124s1.pdf [file ijbsv14p0124s1.pdf]

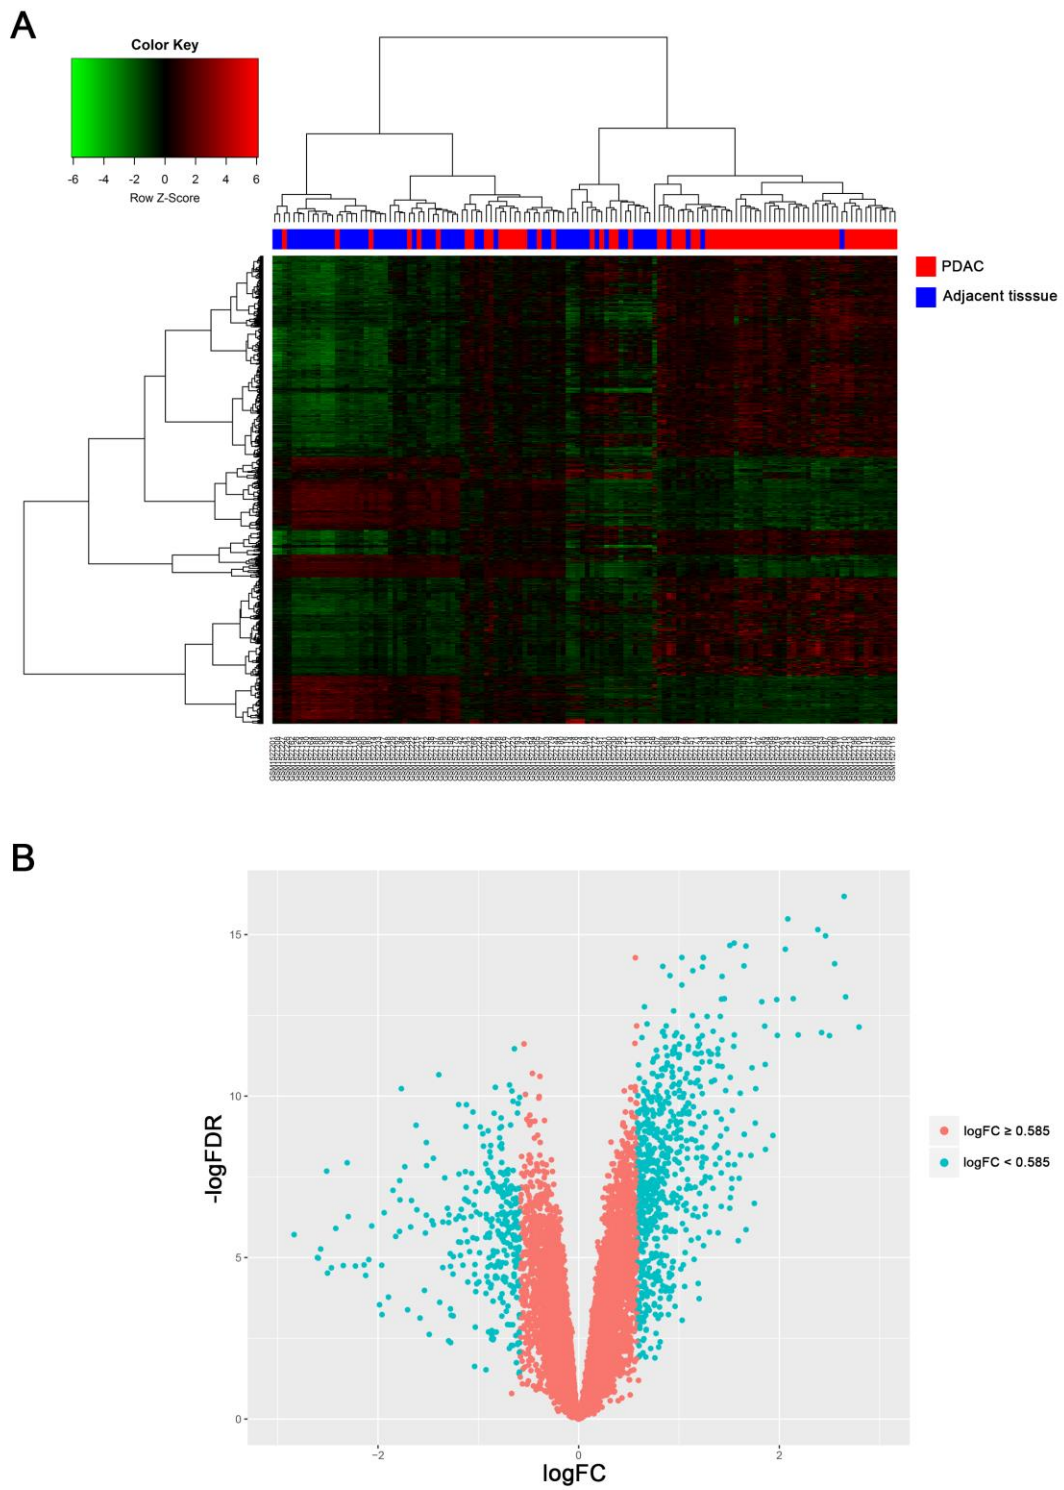

**Figure S1. DEGs of dataset GSE62452. (A)** Heatmap of all DEGs in dataset GSE62452. **(B)** Volcano plot of genes of GSE62452.

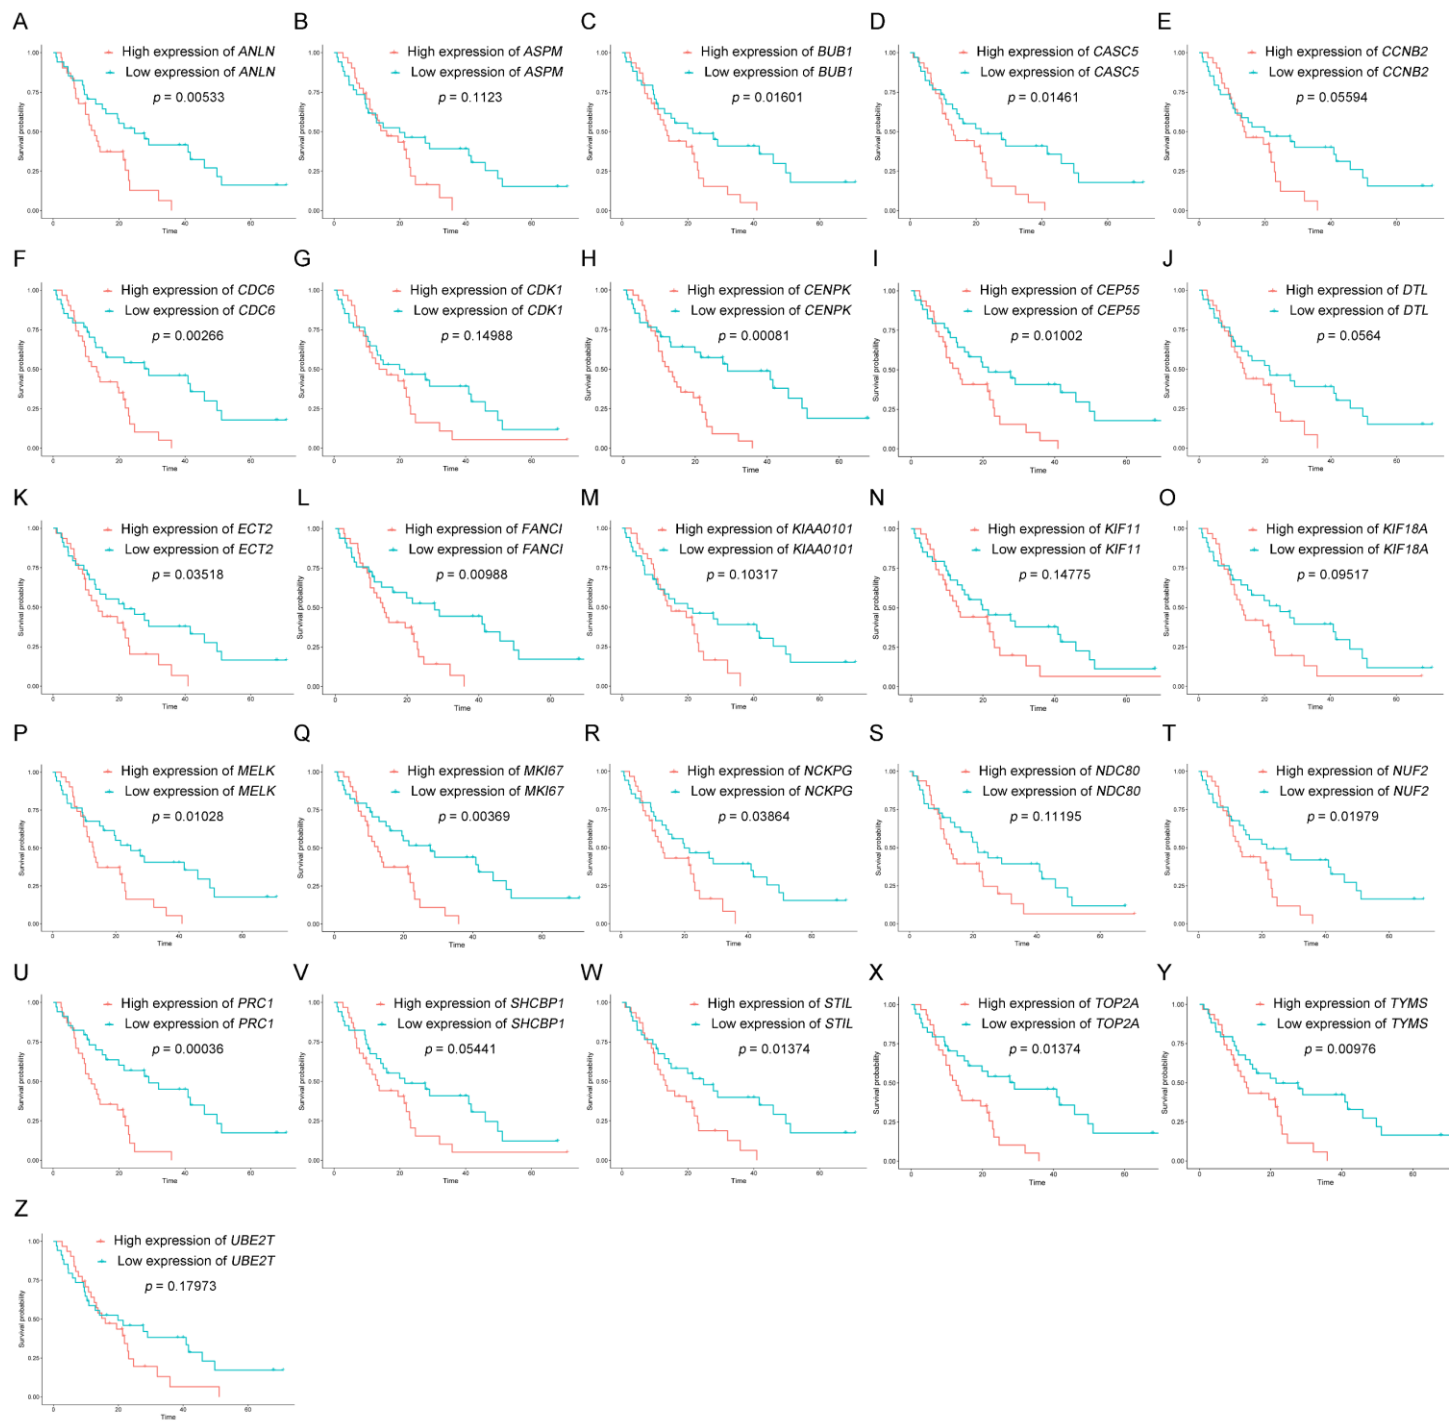

**Figure S2. Survival analysis of the remaining 26 genes in the dataset GSE62452.**

**(A) ANLN. (B) ASPM. (C) BUB1. (D) CASC5. (E) CCNB2. (F) CDC6. (G) CDK1.**

**(H) CENPK. (I) CEP55. (J) DTL. (K) ECT2. (L) FANCI. (M) KIAA0101. (N) KIF11.**

**(O) KIF18A. (P) MELK. (Q) MKI67. (R) NCKPG. (S) NDC80. (T) NUF2. (U) PRC1.**

**(V) SHCBP1. (W) STIL. (X) TOP2A. (Y) TYMS. (Z) UBE2T.** Red lines represent high

expression of the real hub genes and blue lines represent low expression.

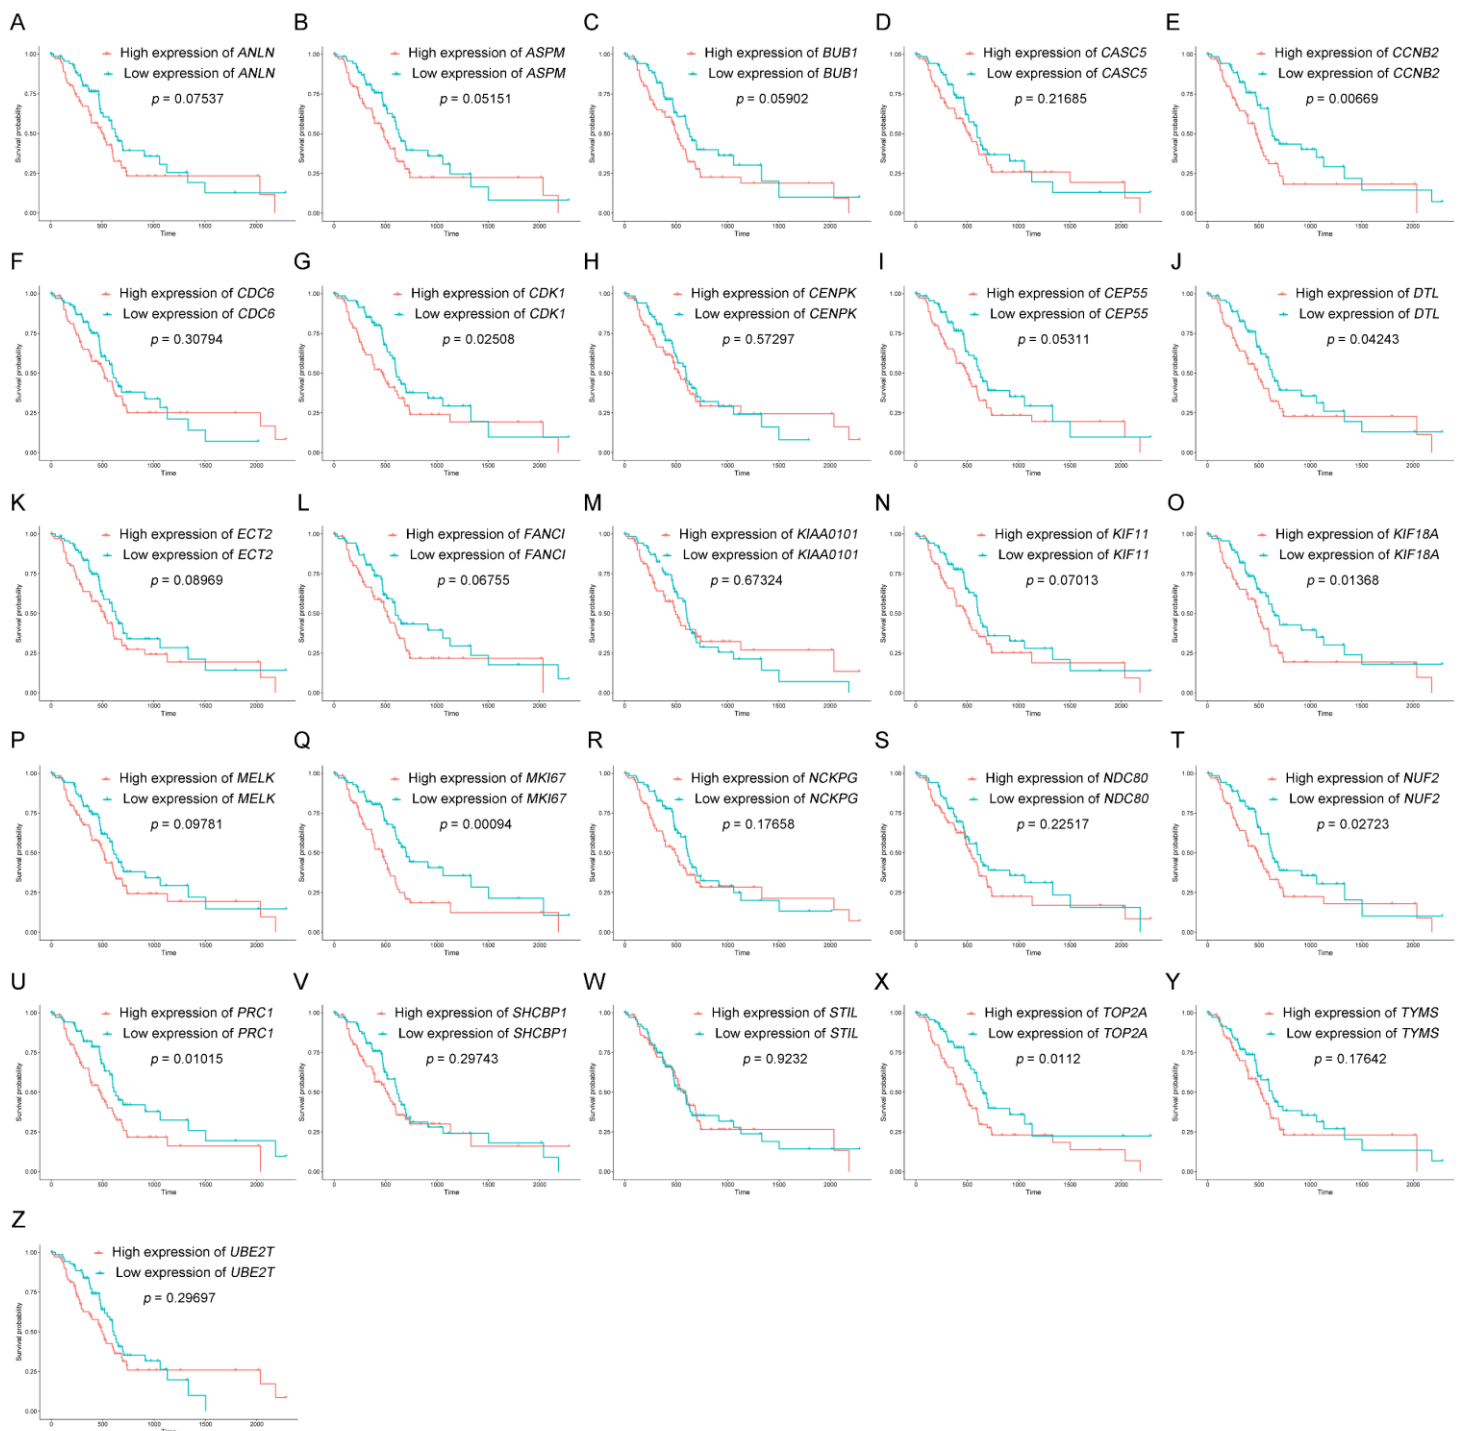

**Figure S3. Survival analysis of the remaining 26 genes in the TCGA dataset. (A) ANLN. (B) ASPM. (C) BUB1. (D) CASC5. (E) CCNB2. (F) CDC6. (G) CDK1. (H) CENPK. (I) CEP55. (J) DTL. (K) ECT2. (L) FANCI. (M) KIAA0101. (N) KIF11. (O) KIF18A. (P) MELK. (Q) MKI67. (R) NCKPG. (S) NDC80. (T) NUF2. (U) PRC1. (V) SHCBP1. (W) STIL. (X) TOP2A. (Y) TYMS. (Z) UBE2T. Red lines represent high expression of the real hub genes and blue lines represent low expression.**

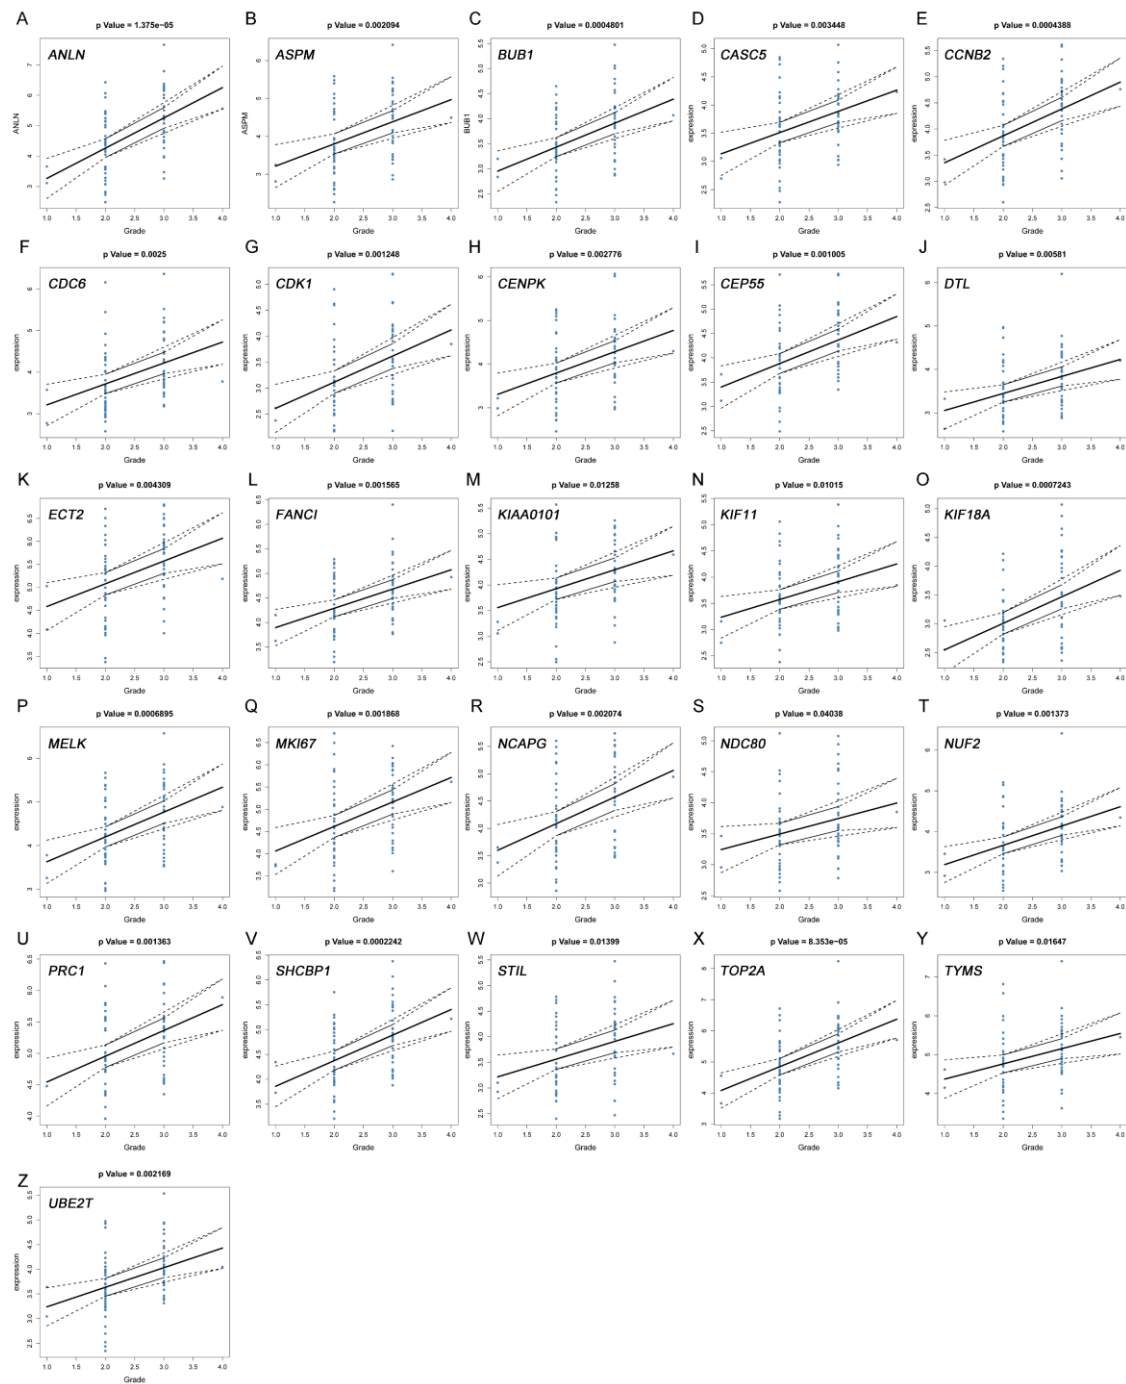

**Figure S4. The correlation between the expression levels of the remaining 26 genes in the dataset GSE62452 and the disease progression of PDAC. (A) *ANLN*. (B) *ASPM*. (C) *BUB1*. (D) *CASC5*. (E) *CCNB2*. (F) *CDC6*. (G) *CDK1*. (H) *CENPK*. (I) *CEP55*. (J) *DTL*. (K) *ECT2*. (L) *FANCI*. (M) *KIAA0101*. (N) *KIF11*. (O) *KIF18A*. (P) *MELK*. (Q) *MKI67*. (R) *NCAPG*. (S) *NDC80*. (T) *NUF2*. (U) *PRC1*. (V) *SHCBP1*. (W) *STIL*. (X) *TOP2A*. (Y) *TYMS*. (Z) *UBE2T*. Grade means histological grade.**

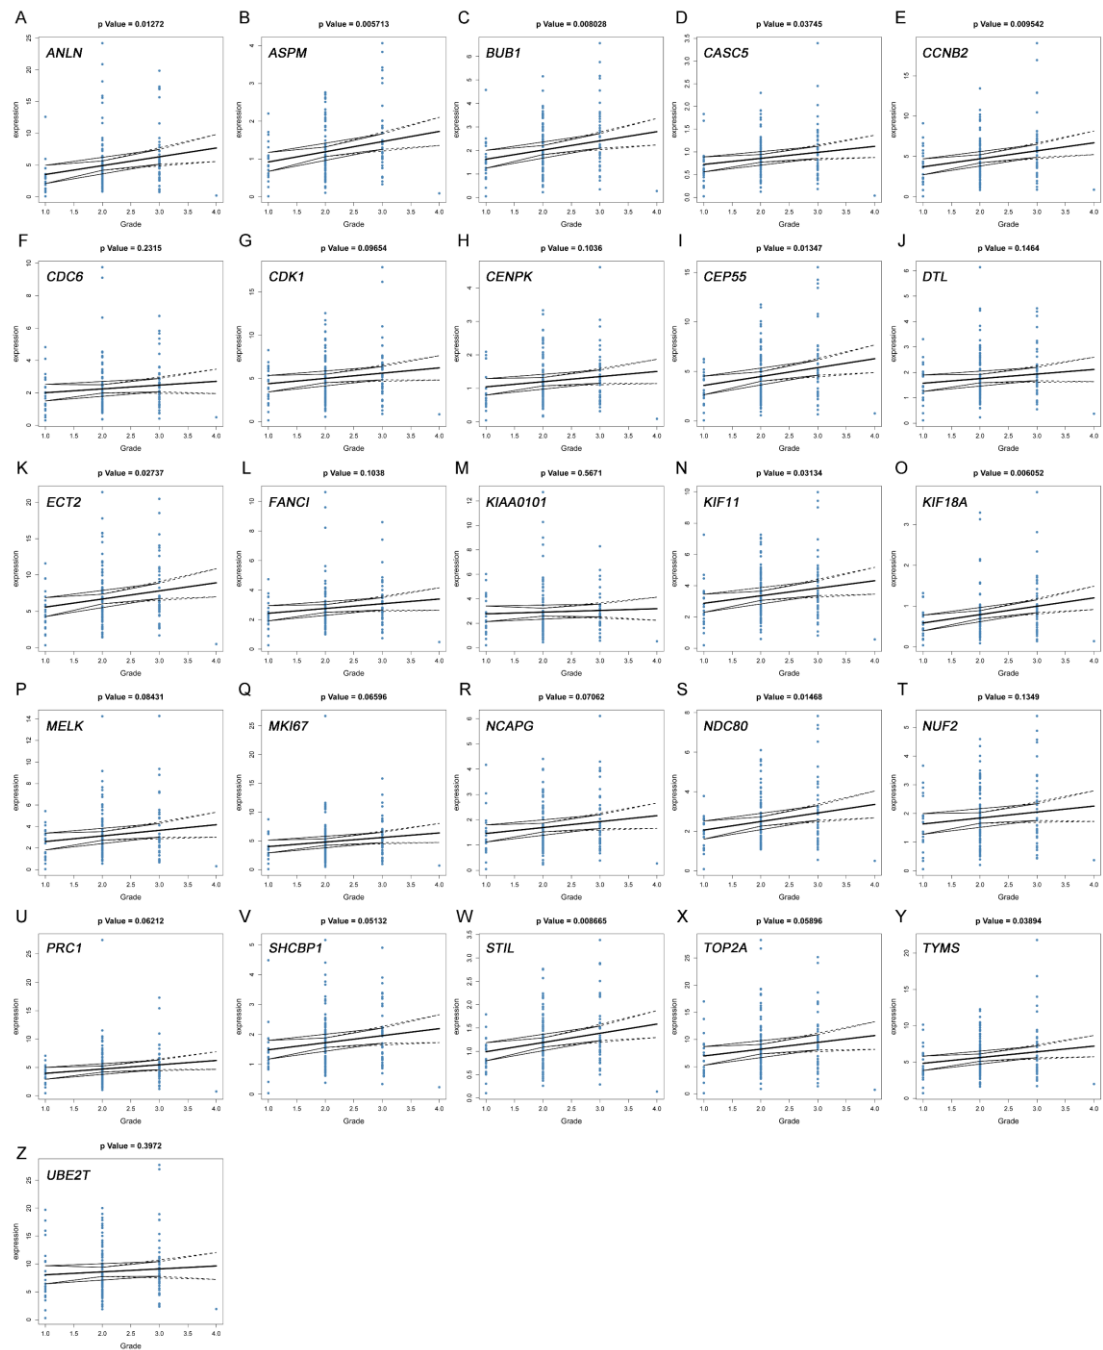

**Figure S5. The correlation between the expression levels of the remaining 26 genes in the TCGA dataset and the disease progression of PDAC. (A) ANLN. (B) ASPM. (C) BUB1. (D) CASC5. (E) CCNB2. (F) CDC6. (G) CDK1. (H) CENPK. (I) CEP55. (J) DTL. (K) ECT2. (L) FANCI. (M) KIAA0101. (N) KIF11. (O) KIF18A. (P) MELK. (Q) MKI67. (R) NCAPG. (S) NDC80. (T) NUF2. (U) PRC1. (V) SHCBP1. (W) STIL. (X) TOP2A. (Y) TYMS. (Z) UBE2T. Grade means histological grade.**

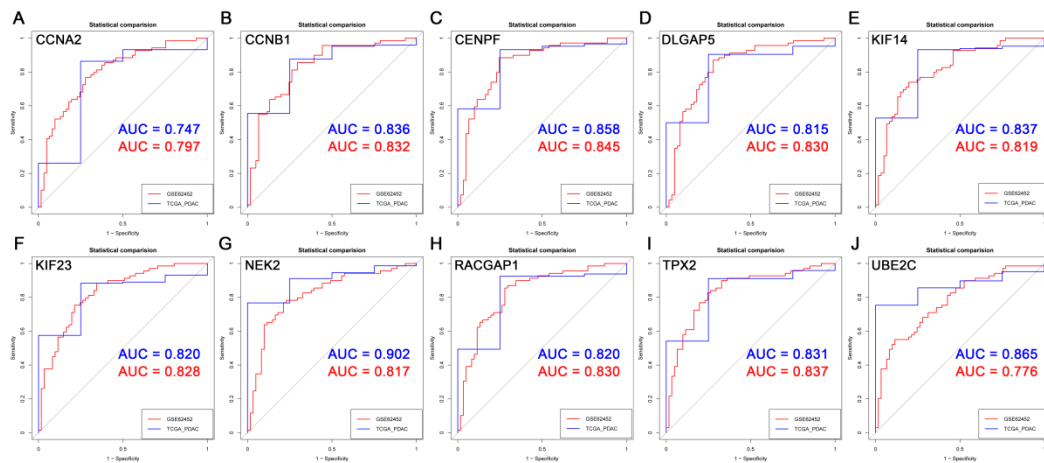

**Figure S6. ROC analysis to distinguish normal and cancer tissues using TCGA and GSE62452. (A) *CCNA2*. (B) *CCNB1*. (C) *CENPF*. (D) *DLGAP5*. (E) *KIF14*. (F) *KIF23*. (G) *NEK2*. (H) *RACGAP1*. (I) *TPX2*. (J) *UBE2C*.** Receiver operating characteristic (ROC) curves and area under the curve (AUC) statistics is to evaluate the capacity of distinguishing recurrent and non-recurrent PDAC.

**Table S1. Clinical information of IHC in Human Protein Atlas database.**

| Gene symbol | Tissue type | ID   | Age | Gender | Staining     |
|-------------|-------------|------|-----|--------|--------------|
| CCNA2       | normal      | 4156 | 57  | male   | low          |
|             | cancer      | 3851 | 63  | male   | Medium       |
| CCNB1       | normal      | 2032 | 35  | female | Not detected |
|             | cancer      | 317  | 66  | female | Medium       |
| CENPF       | normal      | 2032 | 35  | female | Medium       |
|             | cancer      | 1098 | 75  | female | High         |
| DLGAP5      | normal      | 2329 | 66  | male   | Not detected |
|             | cancer      | 3004 | 71  | female | High         |
| KIF14       | normal      | 2220 | 43  | female | Medium       |
|             | cancer      | 3592 | 59  | male   | High         |
| KIF23       | normal      | 2032 | 35  | female | High         |
|             | cancer      | 729  | 70  | male   | High         |
| NEK2        | normal      | 3320 | 70  | female | Not detected |
|             | cancer      | 3548 | 60  | female | High         |
| RACGAP1     | normal      | 2162 | 74  | female | Not detected |
|             | cancer      | 3004 | 71  | female | High         |
| TPX2        | normal      | 2032 | 35  | female | Not detected |
|             | cancer      | 3004 | 71  | female | medium       |
| UBE2C       | normal      | 3320 | 70  | female | High         |
|             | cancer      | 1647 | 63  | male   | High         |
